# Supplementary material
Source: Research Square preprint supplement (doi:10.21203/rs.3.rs-9382926/v1)
Supplement: Supplementary file 1 [file 061547efd19f7319f0dcef8e.pdf]

## Additional File 2. RACSMEI Questionnaire

This document presents the full RACSMEI household and individual questionnaire as provided in the Supplementary Information of the study protocol. Questions are organized by thematic modules. Skip patterns are indicated where applicable. The questionnaire was administered by trained interviewers using electronic data capture tools.

### Target Population and Module Structure

| Target Population            | Modules Covered                     | Key Focus Areas                                                                                         |
|------------------------------|-------------------------------------|---------------------------------------------------------------------------------------------------------|
| Household Respondent Only    | A, B, C, D<br>I4-I6                 | Identification, Socio-demographics, Housing, Domestic Animals, Environmental Exposures                  |
| All Individuals (2–75 years) | E, F2, F3, F4, F5, F6 (except F6.3) | Health, Recent Illness, Travel History, Individual Animal Contact, Mobility                             |
| Adults Only (18 years)       | F1, F6.3, G, H                      | Occupational Exposures, Raw Blood Consumption, Knowledge/Attitudes/Practices (KAP), Climate Perceptions |
| Animal Sampling (Sub-sample) | I                                   | Animal Roster, Specimen Collection, Biosecurity                                                         |

### Module A – Identification (All Level)

| Code | Question                        | Response options                    | Variable type        | Skip logic                                  |
|------|---------------------------------|-------------------------------------|----------------------|---------------------------------------------|
| A0   | Selected persons for interview  | HH / Adult / Children               | Categorical (single) | None                                        |
| A1   | Interviewer ID                  | Dropdown (team list)                | Text                 | None                                        |
| A2   | Interview date                  | DD/MM/YYYY                          | Date                 | None                                        |
| A3   | Start Time                      |                                     | Time                 | None                                        |
| A4   | End time                        |                                     | Time                 | Last of question                            |
| A5   | Province name                   | Text                                | Text                 | None                                        |
| A6   | District name                   | Text                                | Text                 | None                                        |
| A7   | Commune name                    | Text                                | Text                 | None                                        |
| A8   | Village name                    | Text                                | Text                 | None                                        |
| A9   | Household unique ID             | Alphanumeric                        | Text                 | None                                        |
| A10  | Sample ID                       | Link with the sample ID on the tube |                      | None                                        |
| A11  | Respondent name                 | Text                                | Text                 | None                                        |
| A12  | Mobile Number                   | Text                                | Text                 | None                                        |
| A14  | Household Referent Confirmation | 0. Yes / 1. No                      | Binary               | If No → Go to Module E<br>If Yes → continue |

### Module A – Socio-demographics (Household Level)

| Code | Question                                                                                                            | Response options                                                                                                                                                                                                                                                      | Variable type          | Skip logic |
|------|---------------------------------------------------------------------------------------------------------------------|-----------------------------------------------------------------------------------------------------------------------------------------------------------------------------------------------------------------------------------------------------------------------|------------------------|------------|
| A15  | Total Number of household members                                                                                   | Count                                                                                                                                                                                                                                                                 | Integer                | If A14=Yes |
| A16  | Number of eligible household members sleeping in the house at least 4 nights/week [2-75 years old] (including head) | Count                                                                                                                                                                                                                                                                 | Numeric                | If A14=Yes |
| A17  | For how many years, your family has been living in this village?                                                    | Count (in years)                                                                                                                                                                                                                                                      | Numeric                | If A14=Yes |
| A18  | Main Religion of the family                                                                                         | Buddhism / Christianity / Islam / No religion / Prefer not to answer / Other                                                                                                                                                                                          | Categorical (single)   | If A14=Yes |
| A19  | Main Ethnicity of the family                                                                                        | Khmer / Khmer Muslim / Vietnamese / Chinese Lao / Vietnamese / Minority ethnics / Prefer not to answer / Other                                                                                                                                                        | Categorical (single)   | If A14=Yes |
| A20  | Main sources of income                                                                                              | Agriculture, Livestock, animal production/ Fishing, aquaculture /Small business, trade /Salaried employment (public or private) / Daily labor (casual laborers, helpers) / casual work /Remittances (family support) / Social assistance / government support / Other | Categorical (multiple) | If A14=Yes |
| A21  | Household income (monthly)                                                                                          | Amount (USD): under 250 / [250-500[ / [500-1000[ / [1000-1500[ / [1500-2500[ / > 2500                                                                                                                                                                                 | Categorical (ordinal)  | If A14=Yes |

### Module B – Housing, Environment, and Water/Sanitation (Household Level)

| Code | Question                            | Response options                                                                                                                                                 | Variable type        | Skip logic |
|------|-------------------------------------|------------------------------------------------------------------------------------------------------------------------------------------------------------------|----------------------|------------|
| B1   | Type of house                       | Apartment, Condo, Flat / Villa / Barn, Cottage / Traditional grounded wooden house / Traditional houses on pillars / Villa modern house / Floating House / Other | Categorical (single) | None       |
| B2   | Number of rooms (including kitchen) | Count                                                                                                                                                            | Integer              | None       |
| B3   | Main roofing material               | Tile, fibrocement / Brick, stone, concrete / Metal sheets / Thatch, bamboo, palm leave / / Other                                                                 | Categorical (single) | None       |
| B4   | Main wall material                  | Brick, Stone, Concrete / Wood / Thatch, Bamboo, Palm leave / Other                                                                                               | Categorical (single) | None       |
| B5   | Main floor material                 | Wood / Cement, Brick, Stone / Tiles / / Earth, gravel / Other                                                                                                    | Categorical (single) | None       |
| B6   | Main source of lighting             | Solar panels/ Public Grid / Private generator / Battery / None                                                                                                   | Categorical (single) | None       |
| B7   | Main cooking heat sources           | Wood, Firewood / Charcoal / Gas / Biogas / Electricity / Other                                                                                                   | Categorical (single) | None       |

|            |                                                                              |                                                                                                                                                                                               |                        |            |
|------------|------------------------------------------------------------------------------|-----------------------------------------------------------------------------------------------------------------------------------------------------------------------------------------------|------------------------|------------|
| <b>B8</b>  | Which equipment do you have in your household?                               | Agricultural land / Motorbike / Carts / Tuktuk / Fridge / Air Conditioning / Fan / Phone /                                                                                                    | Categorical (multiple) | None       |
| <b>B9</b>  | Do you have tap Water Access                                                 | 0. Yes / 1. No                                                                                                                                                                                | Binary                 | None       |
| <b>B10</b> | Water source for drinking                                                    | Piped / Borehole / Protected well / Surface water (river, lake, pond) / Rain / Bottled Water / Other                                                                                          | Categorical (single)   | None       |
| <b>B11</b> | Do you treat the water you drink?                                            | No treatment / Filtered / Chlorine / Alum / Boil / Other                                                                                                                                      | Categorical (multiple) | None       |
| <b>B12</b> | Water source for washing                                                     | Piped / Borehole / Protected well / Surface water (river, lake, pond) / Rain / Other                                                                                                          | Categorical (single)   | None       |
| <b>B13</b> | Water storage containers present                                             | 0. Yes / 1. No                                                                                                                                                                                | Binary                 | None       |
| <b>B14</b> | If yes, are containers covered?                                              | Daily/ Weekly or several times a week/ Monthly or several times a month / Yearly or less frequently than once a year / Never                                                                  | Categorical (single)   | If B13=Yes |
| <b>B15</b> | Toilet facility available                                                    | 0. Yes / 1. No                                                                                                                                                                                | Binary                 | None       |
| <b>B16</b> | Type of toilet                                                               | Indoor toilet / Pit latrine (outdoor) without septic tank / Outdoor collective toilet room with connection to septic tank / Toilet over water or directly connected to the river/lake / Other | Categorical (single)   | If B15=Yes |
| <b>B17</b> | Is there a shower/bathroom inside the house                                  | 0. Yes / 1. No                                                                                                                                                                                | Binary                 | None       |
| <b>B18</b> | How does your household mainly dispose of its solid waste?                   | Collected by municipality / Burned near house / Buried / Dumped in open area / Thrown in river/canal / Other                                                                                  | Categorical (multiple) | None       |
| <b>B19</b> | Presence of wastewater or dirty water near your household (within 20 meters) | None / Animal manure / Household waste / Plastic waste / Stagnant wastewater / Others                                                                                                         | Categorical (multiple) | None       |
| <b>B20</b> | Distance to nearest health facility                                          | Km                                                                                                                                                                                            | Numeric                | None       |
| <b>B21</b> | Distance to nearest school                                                   | Km                                                                                                                                                                                            | Numeric                | None       |

### Module C – Domestic Animals (Household Level)

| Code      | Question                                                         | Response options | Variable type | Skip logic |
|-----------|------------------------------------------------------------------|------------------|---------------|------------|
| <b>C1</b> | During the past 12 months, has your household raised any animal? | 0. Yes / 1. No   | Binary        | None       |

|              |                                                                                                         |                                                                                                                                                                                 |                        |                              |
|--------------|---------------------------------------------------------------------------------------------------------|---------------------------------------------------------------------------------------------------------------------------------------------------------------------------------|------------------------|------------------------------|
| <b>C2</b>    | Which animal species have you raised in your household during the past 12 months? How many per species? | Dog / Cat / Cow / Buffalo / Chicken / Other (specify)                                                                                                                           | Categorical (multiple) | If C1=Yes                    |
| <b>C3</b>    | How many have died of illness per species during the past 12 months                                     | Dog / Cat / Cow / Buffalo / Chicken / Other (specify)                                                                                                                           | Categorical (multiple) | If C1=Yes                    |
| <b>C4</b>    | Current number of dogs                                                                                  | (Male, Female <1 year)<br>Male, Female >=1 year)                                                                                                                                | Numerical              | If C2_Dogs>0                 |
| <b>C5</b>    | Have you ever vaccinated your dogs against rabies?                                                      | 0. Yes, all / 1. Yes, Some / 2. None                                                                                                                                            | Categorical (single)   | None                         |
| <b>C6</b>    | If yes, how did you get the vaccine?                                                                    | Community Campaign / Own Initiative/Other (specify)                                                                                                                             |                        | If C5=Yes, all OR Yes, Some  |
| <b>C6.1</b>  | Currently, how many of your dogs have been vaccinated less than one year ago against rabies?            | Count                                                                                                                                                                           | Numerical              | If C5=Yes, all OR Yes, Some  |
| <b>C7</b>    | Current number of cats                                                                                  | (Male, Female <1 year)<br>Male, Female >=1 year)                                                                                                                                | Numerical              | If C2_Cats>0                 |
| <b>C8</b>    | Have you ever vaccinated your cats against rabies?                                                      | 0. Yes, all / 1. Yes, Some / 2. None                                                                                                                                            | Categorical (single)   | None                         |
| <b>C9</b>    | If yes, how did you get the vaccine?                                                                    | Community Campaign / Own Initiative / Other (specify)                                                                                                                           |                        | If C8=Yes, all OR Yes, Some  |
| <b>C10</b>   | Currently, how many of your cats have been vaccinated less than one year ago against rabies?            | Count                                                                                                                                                                           | Numerical              | If C8=Yes, all OR Yes, Some  |
| <b>C11</b>   | What do you do with cow/buffalo feces?                                                                  | Left on ground / Collected & reused / Collected & discarded / Other                                                                                                             | Categorical (single)   | If C2: Cows >0 OR Buffalo >0 |
| <b>C12</b>   | What do you do with pigs feces?                                                                         | Left on ground / Collected & reused / Collected & discarded / Other                                                                                                             | Categorical (single)   | If C2: pigs >0               |
| <b>C13</b>   | What do you do with chicken/duck feces?                                                                 | Left on ground / Collected & reused / Collected & discarded / Other                                                                                                             | Categorical (single)   | If C2: Cows >0 OR Buffalo >0 |
| <b>C14</b>   | Location of animal housing                                                                              | Inside house / Adjacent / Separated >50m / Free roaming                                                                                                                         | Categorical (single)   | If C1=Yes                    |
| <b>C15</b>   | Frequency of cleaning animal enclosure                                                                  | Daily/ Weekly or several times a week/ Monthly or several times a month / Yearly or less frequently than once a year / Never                                                    | Categorical (single)   | If C1=Yes                    |
| <b>C16</b>   | Did you have any veterinary visits in the past 12 months?                                               | 0. Yes / 1. No                                                                                                                                                                  | Binary                 | If C1=Yes                    |
| <b>C16.1</b> | What type of veterinary professional visited your household?                                            | Provincial veterinarian/ Private veterinarian/ Village animal health worker / NGP, Project staff /Other (Specify)                                                               | Categorical (multiple) | If C16=Yes                   |
| <b>C17</b>   | How many visits did your household have in the past 12 months?                                          | Once / 2-3 times / 4-6 times / More than 6 times / Don't know                                                                                                                   | Categorical (single)   | If C16=Yes                   |
| <b>C18</b>   | In the last 12 months, have you given antibiotics to any of your animals (pets or livestock)?           | 0. Yes / 1. No/ 2. Don't know                                                                                                                                                   | Categorical (single)   | None                         |
| <b>C19</b>   | What were the reasons for these visits?                                                                 | Vaccination / Parasite treatment / General health check-up / Injury, wound /Respiratory disease / Diarrhea, digestive problems / Skin care, ectoparasites / Reproductive issues | Categorical (Multiple) | If C16=Yes                   |

|              |                                                    |                                                                                                         |                      |            |
|--------------|----------------------------------------------------|---------------------------------------------------------------------------------------------------------|----------------------|------------|
|              |                                                    | (pregnancy birth problems) / Sudden death of an animal / Animal not eating, weakness / Other            |                      |            |
| <b>C20</b>   | Are animals vaccinated (other than dogs and cats)? | 0. Yes / 1. No/ 2. Don't know                                                                           | Categorical (single) | If C1=Yes  |
| <b>C21.1</b> | If yes, for which disease(s)?                      | Cattle, cows, buffalo: Foot and mouth disease / Haemorrhagic speticemia / Brucellosis / Anthrax / Other | Binary (Multiple)    | If C20=Yes |
| <b>C21.2</b> | If yes, for which disease(s)?                      | Pigs: Classic swine fever / Foot and mouth disease / Other                                              | Binary (Multiple)    | If C20=Yes |
| <b>C21.3</b> | If yes, for which disease(s)?                      | Poultry: Avian Influenza / Newcastle disease / Other                                                    | Binary (Multiple)    | If C20=Yes |
| <b>C21.4</b> | If yes, for which disease(s)?                      | Sheep/goats: Foot and mouth disease / Peste des petits ruminants / Other:                               | Binary (Multiple)    | If C20=Yes |

## MODULE D — VECTOR & ENVIRONMENTAL EXPOSURES (HH LEVEL)

### D0 — General Environmental Context

| Code        | Question                                                                                 | Response options                                                                                                                                                                                                                                                                     | Variable type          | Skip logic  |
|-------------|------------------------------------------------------------------------------------------|--------------------------------------------------------------------------------------------------------------------------------------------------------------------------------------------------------------------------------------------------------------------------------------|------------------------|-------------|
| <b>D0.1</b> | Is your household located near (within 100 meters) of any of the following environments? | Forest or large park /Paddy, rice field / Fruit or crop plantations, plantations / River stream, pond, lake / Flood-prone area / Market, wet market/ Waste disposal area /Animal farms (poultry, pigs, cattle) / Pagoda or temple area / Slum, informal settlement / Other (specify) | Categorical (multiple) | None        |
| <b>D0.2</b> | During the past 12 months, has your household experienced flooding?                      | 0. Yes / 1. No                                                                                                                                                                                                                                                                       | Binary                 | None        |
| <b>D0.3</b> | If yes, how many times?                                                                  | Number <i>Count</i>                                                                                                                                                                                                                                                                  | Numeric                | If D0.2=Yes |
| <b>D0.4</b> | Was the house inundated?                                                                 | 0. Yes / 1. No/ 2. Partially                                                                                                                                                                                                                                                         | Categorical (single)   | If D0.2=Yes |

### D1 — Mosquito Exposure & Biting Risk

| Code        | Question                                             | Response options                                                                                                             | Variable type         | Skip logic |
|-------------|------------------------------------------------------|------------------------------------------------------------------------------------------------------------------------------|-----------------------|------------|
| <b>D1.1</b> | Do you notice mosquitoes inside your house?          | Daily/ Weekly or several times a week/ Monthly or several times a month / Yearly or less frequently than once a year / Never | Categorical (ordinal) | None       |
| <b>D1.2</b> | Do you notice mosquitoes outdoors around your house? | Daily/ Weekly or several times a week/ Monthly or several times a month / Yearly or less frequently than once a year / Never | Categorical (ordinal) | None       |

|      |                                                                             |                                                                                                                                                                                                                                                                                                                                                                                |                        |             |
|------|-----------------------------------------------------------------------------|--------------------------------------------------------------------------------------------------------------------------------------------------------------------------------------------------------------------------------------------------------------------------------------------------------------------------------------------------------------------------------|------------------------|-------------|
| D1.3 | At what time of day are mosquitoes most present in your environment?        | Morning / Afternoon / Evening / Night / All day / Don't know                                                                                                                                                                                                                                                                                                                   | Categorical (single)   | None        |
| D1.4 | At what moment of the year?                                                 | Dry season / Rainy season / Throughout the year                                                                                                                                                                                                                                                                                                                                | Categorical (single)   | None        |
| D1.5 | What measures does your household use to reduce mosquitoes around the home? | Removing standing water / Covering water containers / Cleaning water jars/tank regularly / Using larvicides / Using 7-coulour fish, guppy / Installing bednet/ window screens or door screens / Fans or air circulation / Using Insecticide spraying / Using mosquito coils or electric diffusers / Cleaning vegetation, bushes near the house / No specific measures / Others | Categorical (multiple) | None        |
| D1.7 | Have you seen stagnant water around your house in the past 2 weeks?         | 0. Yes / 1. No                                                                                                                                                                                                                                                                                                                                                                 | Binary                 | None        |
| D1.8 | What types of containers hold water around your house?                      | Cement jars / Buckets / Tires / Ponds / Drums / Flower pots / Construction materials / Other                                                                                                                                                                                                                                                                                   | Categorical (multiple) | If D1.7=Yes |

## D2 — Rodent Exposure

| Code | Question                                                                              | Response options                                                                                                                                                                           | Variable type          | Skip logic    |
|------|---------------------------------------------------------------------------------------|--------------------------------------------------------------------------------------------------------------------------------------------------------------------------------------------|------------------------|---------------|
| D2.1 | How often have you observed rodents in or around your household in the past 3 months? | Never during the last 3 months / Rarely (1-2 times in 3 months) / Sometimes (1-3 times per month) / Often (1-3 times per week) / Very often (daily or almost daily) / Don't know, not sure | Binary                 | None          |
| D2.2 | Where were rodents observed?                                                          | Inside the kitchen / Inside the house / Food and grain storage / Yard, garden / Waste disposal areas / Animal enclosures / Market area / Other (specify)                                   | Categorical (multiple) | If D2.1>Never |
| D2.3 | Do rodents damage food, cables, or stored items in or around your house?              | 0. Yes / 1. No                                                                                                                                                                             | Binary                 | If D2.1=Yes   |
| D2.4 | Do you take measures to control rodents?                                              | Traps / Poison / Cats / Sealing holes / None / Other                                                                                                                                       | Categorical (multiple) | If D2.1=Yes   |

## D3 — Tick Exposure / Domestic animals / Forest work

| Code | Question                                                                                            | Response options                                                                | Variable type          | Skip logic   |
|------|-----------------------------------------------------------------------------------------------------|---------------------------------------------------------------------------------|------------------------|--------------|
| D3.1 | Has any household member been bitten by ticks in the last 12 months?                                | 0. Yes / 1. No / 2. Don't know                                                  | Categorical (single)   | If No → D3.2 |
| D3.2 | Where do tick bites usually occur?                                                                  | During farming / Forest work / Handling animals / Around the home / Other       | Categorical (multiple) | D3.1=Yes     |
| D3.3 | Have you seen ticks on any of your household animals or in their surroundings in the past 3 months? | No / Yes, on household animals / Yes, around the animals (in their enclosure) / | Categorical (single)   | None         |

|      |                                                         |                                                                          |                      |           |
|------|---------------------------------------------------------|--------------------------------------------------------------------------|----------------------|-----------|
|      |                                                         | Yes, in the household environment (yard garden, near house) / Don't know |                      |           |
| D3.4 | Have you applied any tick control to household animals? | 0. Yes / 1. No / 2. Don't know                                           | Categorical (single) | If C1=Yes |

#### D4 — Water & Aquatic Exposure

| Code | Question                                                  | Response options                                                                                                                   | Variable type         | Skip logic |
|------|-----------------------------------------------------------|------------------------------------------------------------------------------------------------------------------------------------|-----------------------|------------|
| D4.1 | Do household members swim or bathe in rivers/lakes/ponds? | Daily/ Weekly or several times a week/<br>Monthly or several times a month /<br>Yearly or less frequently than once a year / Never | Categorical (ordinal) | None       |
| D4.2 | Do household members fish in natural waters?              | 0. Yes / 1. No                                                                                                                     | Binary                | None       |
| D4.3 | Do children play in floodwater or puddles?                | Daily/ Weekly or several times a week/<br>Monthly or several times a month /<br>Yearly or less frequently than once a year / Never | Categorical (ordinal) | None       |

#### D5 — Other Environment Exposures

| Code | Question                                                     | Response options                                                                                                                   | Variable type        | Skip logic |
|------|--------------------------------------------------------------|------------------------------------------------------------------------------------------------------------------------------------|----------------------|------------|
| 5.1  | Are there livestock farms nearby (<500m)?                    | 0. Yes / 1. No                                                                                                                     | Binary               | None       |
| D5.2 | Are pesticides used in or around your home?                  | Daily/ Weekly or several times a week/<br>Monthly or several times a month /<br>Yearly or less frequently than once a year / Never | Ordinal              | None       |
| D5.3 | Is there open garbage near your home?                        | 0. Yes / 1. No                                                                                                                     | Binary               | None       |
| D5.4 | Is there an open sewage canal or waste water near your home? | Yes, at 50m / Yes, at 100m / Yes at 500m / No                                                                                      | Categorical (single) | None       |

### MODULE E — HEALTH & ILLNESS (INDIVIDUAL LEVEL)

#### E1 — Recent Fever & Acute Illness (Last 4 Weeks)

| Code | Question                                    | Response options                                                                                                                                                                      | Variable type          | Skip logic  |
|------|---------------------------------------------|---------------------------------------------------------------------------------------------------------------------------------------------------------------------------------------|------------------------|-------------|
| E1.1 | Have you had fever in the last 4 weeks?     | 0. Yes / 1. No / 2. Don't know                                                                                                                                                        | Categorical (single)   | If No → E2  |
| E1.2 | If yes, how many days did the fever last?   | Number                                                                                                                                                                                | Numeric                | If E1.1=Yes |
| E1.3 | Did you have any of the following symptoms? | Rash / Joint Pain / Muscle Pain /<br>Headache / Nausea, Vomiting /<br>Diarrhea / Cough, sore throat /<br>Shortness of breath, Bleeding (nose, gums, vomit, stool) / None of the above | Categorical (multiple) | If E1.1=Yes |

## E2 — Health-Seeking Behavior

| Code  | Question                                                                                     | Response options                                                                                                                                                 | Variable type          | Skip logic                  |
|-------|----------------------------------------------------------------------------------------------|------------------------------------------------------------------------------------------------------------------------------------------------------------------|------------------------|-----------------------------|
| E2.1  | Did you seek care for your recent illness/fever?                                             | 0. Yes / 1. No                                                                                                                                                   | Binary                 | If E1.1=Yes<br>If No → E3   |
| E2.2  | Where did you first seek care?                                                               | Health center / Private clinic / Hospital / Pharmacy / Traditional healer / Did not seek care                                                                    | Categorical (single)   | If E2.1=Yes                 |
| E2.3  | Did you receive any medicines?                                                               | 0. Yes / 1. No                                                                                                                                                   | Binary                 | If E2.1=Yes                 |
| E2.4  | Which medicines did you receive? (multiple)                                                  | Paracetamol / Antibiotics / Antimalarials / Herbal remedies / Other                                                                                              | Categorical (multiple) | If E2.3=Yes                 |
| E2.4a | Did you complete the full course of the antibiotics you received                             | 0. Yes / 1. No / 2. Don't know                                                                                                                                   | Categorical (single)   | If E2.4 antibiotics=Yes     |
| E2.4b | If you stopped taking the antibiotics before finishing the course, what was the main reason? | Felt better / Had side effects / Forgot, missed doses / Too many pills, too long treatment / Ran out of money / Did not think it was necessary / Other (specify) | Categorical (multiple) | If E2.4a=No antibiotics=Yes |
| E2.5  | Did you get a diagnostic test?                                                               | 0. Yes / 1. No / 2. Don't know                                                                                                                                   | Categorical (single)   | If E2.1=Yes                 |
| E2.6  | Which test(s) did you receive?                                                               | Dengue test / Malaria test / Blood test / Ultrasound / X-ray / Other                                                                                             | Categorical (multiple) | If E2.5=Yes                 |

## E3 — Hospitalization & Severe Symptoms

| Code | Question                                              | Response options                                                                                    | Variable type        | Skip logic                       |
|------|-------------------------------------------------------|-----------------------------------------------------------------------------------------------------|----------------------|----------------------------------|
| E3.1 | Were you hospitalized for this illness?               | 0. Yes / 1. No                                                                                      | Categorical (single) | If E1.1=Yes<br>If No → Skip E3.4 |
| E3.2 | How many days were you hospitalized?                  | Number                                                                                              | Numeric              | E3.1=Yes                         |
| E3.3 | Did any doctor mention a suspected disease?           | Dengue / Influenza / Pneumonia / Malaria / Typhoid / Don't know / Other                             | Categorical ?        | E3.1=Yes                         |
| E3.4 | Did you receive a diagnostic result for this illness? | 0. Yes / 1. No / 2. Don't know                                                                      | Categorical (single) | None                             |
| E3.5 | If yes, what was the diagnosis given?                 | Dengue / Influenza / Pneumonia / Malaria / Typhoid / Viral Infection / Other (Specify) / Don't know | Categorical (single) | If E3.4=Yes                      |

## E4 — Past Medical History (Chronic Diseases)

| Code | Question                          | Response options                                                                                                                        | Variable type          | Skip logic |
|------|-----------------------------------|-----------------------------------------------------------------------------------------------------------------------------------------|------------------------|------------|
| E4.1 | Do you have any chronic diseases? | Hypertension / Diabete / Heart disease / Chronic lung disease / Chronic Kidney or liver disease / Immune deficiency / None / Don't know | Categorical (multiple) | None       |

### E5- Vaccination History

| Code         | Question                                                                      | Response options               | Variable type        | Skip logic |
|--------------|-------------------------------------------------------------------------------|--------------------------------|----------------------|------------|
| E5.1.1       | Have you ever received Diphtheria vaccine?                                    | 0. Yes / 1. No / 2. Don't know | Categorical (single) | None       |
| E5.1.2       | Have you ever received Tetanus vaccine?                                       | 0. Yes / 1. No / 2. Don't know | Categorical (single) | None       |
| E5.1.3       | Have you ever received Pertussis vaccine?                                     | 0. Yes / 1. No / 2. Don't know | Categorical (single) | None       |
| E5.1.4       | Have you ever received Measles vaccine?                                       | 0. Yes / 1. No / 2. Don't know | Categorical (single) | None       |
| E5.1.5       | Have you ever received Mumps vaccine?                                         | 0. Yes / 1. No / 2. Don't know | Categorical (single) | None       |
| E5.1.6       | Have you ever received Rubella vaccine?                                       | 0. Yes / 1. No / 2. Don't know | Categorical (single) | None       |
| E5.1.7       | Have you ever received Varicella vaccine?                                     | 0. Yes / 1. No / 2. Don't know | Categorical (single) | None       |
| E5.1.8       | Have you ever received Meningitis by Menigococcus type A vaccine?             | 0. Yes / 1. No / 2. Don't know | Categorical (single) | None       |
| E5.1.9       | Have you ever received Streptococcus pneumoniae vaccine?                      | 0. Yes / 1. No / 2. Don't know | Categorical (single) | None       |
| E5.1.10      | Have you ever received Yellow fever vaccine?                                  | 0. Yes / 1. No / 2. Don't know | Categorical (single) | None       |
| E5.1.11      | Have you ever received Human papillomavirus (HPV) vaccine?                    | 0. Yes / 1. No / 2. Don't know | Categorical (single) | None       |
| E5.2         | Have you received an influenza vaccine in the past year?                      | 0. Yes / 1. No / 2. Don't know | Categorical (single) | None       |
| E5.3         | Have you ever received a JE vaccine in the past year? (Japanese Encephalitis) | 0. Yes / 1. No / 2. Don't know | Categorical (single) | None       |
| E5.4         | Have you ever received Covid-19 vaccine in the past year?                     | 0. Yes / 1. No / 2. Don't know | Categorical (single) | None       |
| E5.5         | Have you ever received Rabies vaccine in the past year?                       | 0. Yes / 1. No / 2. Don't know | Categorical (single) | None       |
| E5.6 (Other) | Other vaccines                                                                | Free text                      | Text                 | None       |

### E6- Past Infections (Pathogens-specific History)

| Code | Question                                                               | Response options               | Variable type        | Skip logic |
|------|------------------------------------------------------------------------|--------------------------------|----------------------|------------|
| E6.1 | Have you ever been diagnosed for Dengue by a health professional?      | 0. Yes / 1. No / 2. Don't know | Categorical (single) | None       |
| E6.2 | Have you ever been diagnosed for Zika by a health professional?        | 0. Yes / 1. No / 2. Don't know | Categorical (single) | None       |
| E6.3 | Have you ever been diagnosed for Chikungunya by a health professional? | 0. Yes / 1. No / 2. Don't know | Categorical (single) | None       |
| E6.4 | Have you ever been diagnosed for Malaria by a health professional?     | 0. Yes / 1. No / 2. Don't know | Categorical (single) | None       |

|             |                                                                                  |                                |                      |      |
|-------------|----------------------------------------------------------------------------------|--------------------------------|----------------------|------|
| <b>E6.5</b> | Have you ever been diagnosed for Japanese Encephalitis by a health professional? | 0. Yes / 1. No / 2. Don't know | Categorical (single) | None |
| <b>E6.6</b> | Have you ever been diagnosed for Influenza A/B by a health professional?         | 0. Yes / 1. No / 2. Don't know | Categorical (single) | None |
| <b>E6.7</b> | Have you ever been diagnosed for Leptospirosis by a health professional?         | 0. Yes / 1. No / 2. Don't know | Categorical (single) | None |
| <b>E6.8</b> | Other Infections                                                                 | Free Text                      | Text                 | None |

## **MODULE F—INDIVIDUAL EXPOSURES (ACTIVITIES, OCCUPATIONS, TRAVEL, ANIMAL CONTACT)**

### **F1- Occupational Exposure**

| <b>Code</b>   | <b>Question</b>                                                        | <b>Response options</b>                                                                                                        | <b>Variable type</b>         | <b>Skip logic</b>       |
|---------------|------------------------------------------------------------------------|--------------------------------------------------------------------------------------------------------------------------------|------------------------------|-------------------------|
| <b>F1.1</b>   | Do you work with animals as part of your job/occupation?               | 0. Yes / 1. No                                                                                                                 | Binary                       | If Age > 17             |
| <b>F1.2</b>   | If yes, which type of animals?                                         | Dog / Cat / Pig / Cattle / Buffalo / Chicken / Duck / Goat / Sheep / Horse / Birds / Other                                     | Categorical (multiple)       | If Age > 17 & F1.1=Yes  |
| <b>F1.3</b>   | Do you slaughter animals?                                              | 0. Yes / 1. No                                                                                                                 | Binary                       | If Age > 17             |
| <b>F1.3.1</b> | If yes, which kind of animals                                          | Dog / Cat / Pig / Cattle / Buffalo / Chicken / Duck / Goat / Sheep / Horse / Birds / Other                                     | Categorical (multiple)       | If F1.3=Yes             |
| <b>F1.4</b>   | Do you farm aquatic animals (fish, shrimp, lobster, crocodile, snail)? | 0. Yes / 1. No                                                                                                                 | Binary                       | None                    |
| <b>F1.5</b>   | Do you handle raw meat regularly?                                      | Daily / Weekly or several times a week / Monthly or several times a month / Yearly or less frequently than once a year / Never | Categorical (single ordinal) | If F1.3=Yes or F1.1=Yes |
| <b>F1.6</b>   | Are you in contact with animal blood?                                  | Daily / Weekly or several times a week / Monthly or several times a month / Yearly or less frequently than once a year / Never | Categorical (single ordinal) | If F1.3=Yes             |
| <b>F1.7</b>   | Do you work in forests, plantations, or fields?                        | Daily / Weekly or several times a week / Monthly or several times a month / Yearly or less frequently than once a year / Never | Categorical (single ordinal) | None                    |
| <b>F1.8</b>   | Do you sleep overnight at worksites (forest, fields)?                  | 0. Yes / 1. No                                                                                                                 | Binary                       | If F1.7=Yes             |

### **F2- Daily Activities & Mobility**

| Code | Question                                                 | Response options                                                                                                               | Variable type                | Skip logic  |
|------|----------------------------------------------------------|--------------------------------------------------------------------------------------------------------------------------------|------------------------------|-------------|
| F2.1 | How much time do you spend outdoors daily?               | 1h / ]1–3]h / ]3–6]h / >6h                                                                                                     | Categorical (single ordinal) | None        |
| F2.2 | Do you perform agricultural activities?                  | 0. Yes / 1. No                                                                                                                 | Binary                       | None        |
| F2.3 | Which agricultural activities?                           | Planting / Harvesting / Irrigation / Weeding / Pesticide application / Other                                                   | Categorical (multiple)       | If F2.2=Yes |
| F2.4 | Do you personally bathe, swim or wash in natural waters? | Daily / Weekly or several times a week / Monthly or several times a month / Yearly or less frequently than once a year / Never | Categorical (single ordinal) | None        |
| F2.5 | Do you play/work near stagnant water areas?              | 0. Yes / 1. No                                                                                                                 | Binary                       | None        |

### F3- Individual Animal Contact & Handling

| Code  | Question                                                                 | Response options                                                                  | Variable type          | Skip logic   |
|-------|--------------------------------------------------------------------------|-----------------------------------------------------------------------------------|------------------------|--------------|
| F3.1  | Do you personally take care or handle animals at home?                   | 0. Yes / 1. No                                                                    | Binary                 | None         |
| F3.2  | Which animals do you handle?                                             | Same exhaustive list as Module C / Other                                          | Categorical (multiple) | If F3.1=Yes  |
| F3.3  | Do you feed animals?                                                     | 0. Yes / 1. No                                                                    | Binary                 | If F3.1=Yes  |
| F3.4  | Do you clean animal enclosures?                                          | 0. Yes / 1. No                                                                    | Binary                 | If F3.1=Yes  |
| F3.5  | Do you collect eggs or milk?                                             | 0. Yes / 1. No                                                                    | Binary                 | If F3.1=Yes  |
| F3.6  | Do you ever assist animal births or handled placenta or aborted fetuses? | 0. Yes / 1. No                                                                    | Binary                 | If F3.1=Yes  |
| F3.6a | For which animal?                                                        | Cattle / Buffalo / Goats / Sheep / Pigs / Dogs / Cats / Poultry / Other (specify) | Categorical (multiple) | If F3.6= Yes |
| F3.7  | Have you been scratched or bitten by any animal in the last 12 months?   | 0. Yes / 1. No                                                                    | Binary                 | None         |
| F3.8  | If yes, specify animal species                                           | Same species list including dogs/cats                                             | Categorical (multiple) | If F3.7=Yes  |
| F3.9  | Did you seek care after the bite/scratch?                                | Yes, medical consultation / Yes, rabies vaccine/ Did not seek care                | Categorical (multiple) | If F3.7=Yes  |

### F4- Travel History

| Code | Question                                                     | Response options                                                                   | Variable type          | Skip logic  |
|------|--------------------------------------------------------------|------------------------------------------------------------------------------------|------------------------|-------------|
| F4.1 | Have you traveled outside your village in the last 3 months? | 0. Yes / 1. No                                                                     | Binary                 | None        |
| F4.2 | If yes, destinations?                                        | District / Province / Phnom Penh / Other country                                   | Categorical (multiple) | If F4.1=Yes |
| F4.3 | Purpose of travel                                            | Work / Family visit / School / Market / Health care / Religious activities / Other | Categorical (single)   | If F4.1=Yes |

|             |                                                                  |                                          |                              |             |
|-------------|------------------------------------------------------------------|------------------------------------------|------------------------------|-------------|
| <b>F4.4</b> | What was the typical duration of your stays outside the village? | <1 day / 1–7 days / 7–30 days / >1 month | Categorical (single ordinal) | If F4.1=Yes |
| <b>F4.5</b> | During these trips, did you sleep away from home?                | 0. Yes / 1. No                           | Binary                       | If F4.1=Yes |

### ***F5 – Individual Environmental Exposures (micro-level)***

| <b>Code</b> | <b>Question</b>                                           | <b>Response options</b>                                                                                                                                              | <b>Variable type</b>         | <b>Skip logic</b> |
|-------------|-----------------------------------------------------------|----------------------------------------------------------------------------------------------------------------------------------------------------------------------|------------------------------|-------------------|
| <b>F5.1</b> | Have you been bitten by a mosquito in the last 7 days?    | 0. Yes / 1. No / 2. Don't know                                                                                                                                       | Categorical (single)         | None              |
| <b>F5.2</b> | Where are you exposed to the most?                        | Inside the house / Houseyard around the house / During agriculture works away from home / During works linked to forest / Workplace away from home / School / Others | Categorical (multiple)       | None              |
| <b>F5.3</b> | Have you seen rats or mice near your workplace or school? | 0. Yes / 1. No                                                                                                                                                       | Binary                       | None              |
| <b>F5.4</b> | Do you walk barefoot outdoors?                            | Daily / Weekly or several times a week / Monthly or several times a month / Yearly or less frequently than once a year / Never                                       | Categorical (single ordinal) | None              |
| <b>F5.5</b> | Do you collect water from natural sources?                | 0. Yes / 1. No                                                                                                                                                       | Binary                       | None              |

### ***F6 – High-Risk Behaviors***

| <b>Code</b> | <b>Question</b>                                    | <b>Response options</b>                                                                                                        | <b>Variable type</b>         | <b>Skip logic</b> |
|-------------|----------------------------------------------------|--------------------------------------------------------------------------------------------------------------------------------|------------------------------|-------------------|
| <b>F6.1</b> | Do you consume raw or undercooked meat?            | Daily / Weekly or several times a week / Monthly or several times a month / Yearly or less frequently than once a year / Never | Categorical (single ordinal) | None              |
| <b>F6.2</b> | Do you consume raw or unpasteurized milk?          | Daily / Weekly or several times a week / Monthly or several times a month / Yearly or less frequently than once a year / Never | Categorical (single ordinal) | None              |
| <b>F6.3</b> | Do you consume raw blood dishes (prahok/plea/lab)? | Daily / Weekly or several times a week / Monthly or several times a month / Yearly or less frequently than once a year / Never | Categorical (single ordinal) | None              |
| <b>F6.4</b> | Do you frequently visit markets with live animals? | Daily / Weekly or several times a week / Monthly or several times a month /                                                    | Categorical (single ordinal) | None              |

|      |                                             |                                                                                                                                |                              |      |
|------|---------------------------------------------|--------------------------------------------------------------------------------------------------------------------------------|------------------------------|------|
|      |                                             | Yearly or less frequently than once a year / Never                                                                             |                              |      |
| F6.5 | Do you burn waste inside or near the house? | Daily / Weekly or several times a week / Monthly or several times a month / Yearly or less frequently than once a year / Never | Categorical (single ordinal) | None |

## MODULE G — Knowledge, Attitudes & Practices (KAP)

### G1 – General Infectious Disease Knowledge

| Code | Question                                                     | Response options                                                                                                                | Variable type          | Skip logic |
|------|--------------------------------------------------------------|---------------------------------------------------------------------------------------------------------------------------------|------------------------|------------|
| G1.1 | Have you heard about infectious diseases before this survey? | 0. Yes / 1. No                                                                                                                  | Binary                 | None       |
| G1.2 | How do people commonly become infected? (multiple)           | Mosquito bites / Animal contact / Drinking unsafe water / Eating unsafe food / Airborne / Person-to-person / Don't know / Other | Categorical (multiple) | None       |
| G1.3 | Can healthy-looking people carry microbes/germs?             | 0. Yes / 1. No / 2. Don't know                                                                                                  | Categorical (single)   | None       |
| G1.4 | Do you believe diseases can pass from animals to humans?     | 0. Yes / 1. No / 2. Don't know                                                                                                  | Categorical (single)   | None       |
| G1.5 | Do you believe diseases can pass from environment to humans? | 0. Yes / 1. No / 2. Don't know                                                                                                  | Categorical (single)   | None       |
| G1.6 | Do you believe diseases can pass from mosquitoes to humans?  | 0. Yes / 1. No / 2. Don't know                                                                                                  | Categorical (single)   | None       |

### G2 – Mosquito-Borne Disease Knowledge

| Code | Question                                                                                        | Response options                                                                         | Variable type        | Skip logic           |
|------|-------------------------------------------------------------------------------------------------|------------------------------------------------------------------------------------------|----------------------|----------------------|
| G2.1 | Have you heard of the following diseases?                                                       | Dengue Yes / No<br>Chikungunya Yes / No<br>JEV Yes / No<br>Zika Yes/No<br>Malaria Yes/No | Binary (multiple)    | None                 |
| G2.2 | How is dengue transmitted?                                                                      | By Mosquito bites / By Dirty water / By Food / Person-to-person / Don't know             | Categorical (single) | If G2.1=Yes (Dengue) |
| G2.3 | Can a mosquito become infected by biting a sick person and then transmit the disease to others? | 0. Yes / 1. No / 2. Don't know                                                           | Categorical (single) | None                 |

|             |                              |                                                                                                                                                                                                 |                        |      |
|-------------|------------------------------|-------------------------------------------------------------------------------------------------------------------------------------------------------------------------------------------------|------------------------|------|
| <b>G2.4</b> | How can dengue be prevented? | Using bed nets/Using repellents/Eliminating standing water / breeding sites/Cleaning shrubs / vegetation/Using mosquito coils or fans/Vaccination/Medicines (incorrect belief)/Don't know/Other | Categorical (multiple) | None |
|-------------|------------------------------|-------------------------------------------------------------------------------------------------------------------------------------------------------------------------------------------------|------------------------|------|

### **G3 – Zoonotic Disease Knowledge**

| Code        | Question                                 | Response options                                                                     | Variable type          | Skip logic  |
|-------------|------------------------------------------|--------------------------------------------------------------------------------------|------------------------|-------------|
| <b>G3.1</b> | From which animals can humans get sick?  | Dogs / Cats / Chickens / Ducks / Pigs / Cattle / Rodents / Bats / Don't know / Other | Categorical (multiple) | If G1.5=Yes |
| <b>G3.2</b> | Have you heard about rabies?             | 0. Yes / 1. No                                                                       | Binary                 | None        |
| <b>G3.3</b> | What should you do after a dog/cat bite? | Wash wound / Go to health facility / Do nothing / Traditional healer / Don't know    | Categorical (Multiple) | If G3.2=Yes |
| <b>G3.4</b> | Have you heard of leptospirosis?         | 0. Yes / 1. No                                                                       | Binary                 | None        |
| <b>G3.5</b> | How can leptospirosis be prevented?      | Avoid floodwater / Boots / Hygiene / Don't know                                      | Categorical (multiple) | If G3.4=Yes |

### **G4 – Food & Water-Borne Disease Knowledge**

| Code        | Question                                   | Response options                                                                                      | Variable type          | Skip logic  |
|-------------|--------------------------------------------|-------------------------------------------------------------------------------------------------------|------------------------|-------------|
| <b>G4.1</b> | Can unsafe water cause disease?            | 0. Yes / 1. No / 2. Don't know                                                                        | Categorical (single)   | None        |
| <b>G4.2</b> | What diseases can come from unsafe water?  | Diarrhea / Cholera / Typhoid / Hepatitis A/E / Don't know / Other                                     | Categorical (multiple) | If G4.1=Yes |
| <b>G4.3</b> | Can raw/undercooked meat make people sick? | 0. Yes / 1. No / 2. Don't know                                                                        | Categorical (single)   | None        |
| <b>G4.4</b> | Which foods are risky?                     | Raw meat / Raw fish / Uncooked vegetables / Unboiled water / Street food / Don't know / Other specify | Categorical (multiple) | None        |

### **G5 – Respiratory Disease Knowledge**

| Code | Question | Response options | Variable type | Skip logic |
|------|----------|------------------|---------------|------------|
|------|----------|------------------|---------------|------------|

|             |                                  |                                                                                               |                        |             |
|-------------|----------------------------------|-----------------------------------------------------------------------------------------------|------------------------|-------------|
| <b>G5.1</b> | Have you heard of flu/influenza? | 0. Yes / 1. No                                                                                | Binary                 | None        |
| <b>G5.2</b> | How does flu spread?             | Coughing / Sneezing / Close contact / Mosquitoes / Don't know                                 | Categorical (multiple) | If G5.1=Yes |
| <b>G5.3</b> | What prevents flu?               | Masks / Handwashing / Staying home / Vaccination / Mosquito Repellents / bednets / Don't know | Categorical (multiple) | If G5.1=Ye  |

### ***G6 – Attitudes Toward Health-Seeking Behavior***

| <b>Code</b> | <b>Question</b>                                              | <b>Response options</b>                                                                                                         | <b>Variable type</b>         | <b>Skip logic</b> |
|-------------|--------------------------------------------------------------|---------------------------------------------------------------------------------------------------------------------------------|------------------------------|-------------------|
| <b>G6.1</b> | If you or a family member feels sick, where do you go first? | Health center / Hospital / Private clinic / Pharmacy / Traditional healer / Self-treatment / It depends on the symptoms / Other | Categorical (single)         | None              |
| <b>G6.2</b> | Do you think visiting a health facility is affordable?       | Yes / No / Sometimes                                                                                                            | Categorical (single)         | None              |
| <b>G6.3</b> | What prevents you from seeking care? (multiple)              | Cost / Distance / Lack of transport / No time / Fear / Not serious / Other                                                      | Categorical (multiple)       | None              |
| <b>G6.4</b> | Do you trust health workers?                                 | 0. Yes / 1. No / 2. Partially                                                                                                   | Categorical (single ordinal) | None              |

### ***G7 – Preventive Practices***

| <b>Code</b> | <b>Question</b>                               | <b>Response options</b>                                                                                                        | <b>Variable type</b>         | <b>Skip logic</b> |
|-------------|-----------------------------------------------|--------------------------------------------------------------------------------------------------------------------------------|------------------------------|-------------------|
| <b>G7.1</b> | Do you sleep under a mosquito net personally? | Daily / Weekly or several times a week / Monthly or several times a month / Yearly or less frequently than once a year / Never | Categorical (single ordinal) | None              |
| <b>G7.2</b> | Are your nets treated?                        | 0. Yes / 1. No / 2. Don't know                                                                                                 | Categorical (single)         | If G7.1 ≠ Never   |
| <b>G7.3</b> | Do you use mosquito repellent?                | Daily / Weekly or several times a week / Monthly or several times a month / Yearly or less frequently than once a year / Never | Categorical (single ordinal) | None              |
| <b>G7.4</b> | Do you wash hands regularly with soap?        | Daily / Weekly or several times a week / Monthly or several times a month / Yearly or less frequently than once a year / Never | Categorical (single ordinal) | None              |
| <b>G7.5</b> | Do you boil or filter drinking water?         | Daily/ Weekly or several times a week/ Monthly or several times a month /                                                      | Categorical (single ordinal) | None              |

|      |                                    |                                                                                                                                    |                              |      |
|------|------------------------------------|------------------------------------------------------------------------------------------------------------------------------------|------------------------------|------|
|      |                                    | Yearly or less frequently than once a year / Never                                                                                 |                              |      |
| G7.6 | Do you properly cover stored food? | Daily/ Weekly or several times a week/<br>Monthly or several times a month /<br>Yearly or less frequently than once a year / Never | Categorical (single ordinal) | None |

## G8 – Information Access & Communication Channels

| Code | Question                                                   | Response options                                                                              | Variable type          | Skip logic  |
|------|------------------------------------------------------------|-----------------------------------------------------------------------------------------------|------------------------|-------------|
| G8.1 | Where do you get health information?                       | TV / Radio / Social Media / Health center / Village chief / School / Family / Posters / Other | Categorical (multiple) | None        |
| G8.2 | Which sources do you trust most?                           | TV / Radio / Social Media / Health center / Village chief / School / Family / Posters / Other | Categorical (multiple) | None        |
| G8.3 | Have you ever received messages about mosquito prevention? | 0. Yes / 1. No                                                                                | Binary                 | None        |
| G8.4 | Which messages do you remember?                            | Free Text                                                                                     | Text                   | If G8.3=Yes |

## MODULE H — CLIMATE PERCEPTIONS

### H1 – Perceived Climate Changes

| Code | Question                                                      | Response options                                                                                                                                           | Variable type                | Skip logic  |
|------|---------------------------------------------------------------|------------------------------------------------------------------------------------------------------------------------------------------------------------|------------------------------|-------------|
| H1.1 | Have you noticed changes in the climate over recent years?    | 0. Yes / 1. No / 2. Don't know                                                                                                                             | Categorical (single)         | None        |
| H1.2 | If yes, what kind of changes have you noticed?                | Hotter temperatures / More frequent heatwaves / More rain / Less rain / More floods / More droughts / More storms / Irregular seasons / Don't know / Other | Categorical (multiple)       | If H1.1=Yes |
| H1.3 | Are seasons today different from when you were younger?       | Yes, a lot / Yes, a little / No / Don't know                                                                                                               | Categorical (single ordinal) | None        |
| H1.4 | Do you feel temperatures have increased in the last 10 years? | 0. Yes / 1. No / 2. Don't know                                                                                                                             | Categorical (single)         | None        |

### H2 – Climate Health Link Perception

| Code | Question                                                            | Response options                                                                                                  | Variable type          | Skip logic  |
|------|---------------------------------------------------------------------|-------------------------------------------------------------------------------------------------------------------|------------------------|-------------|
| H2.1 | Do you think climate affects human health?                          | 0. Yes / 1. No / 2. Don't know                                                                                    | Categorical (single)   | None        |
| H2.2 | Which health issues increase with high temperatures? (multiple)     | Fever / Dehydration / Heatstroke / Mosquito-borne diseases / Skin diseases / Don't know / Other                   | Categorical (multiple) | If H2.1=Yes |
| H2.3 | Which health issues increase with heavy rains or floods? (multiple) | Mosquito-borne diseases / Diarrhea / Leptospirosis / Skin infections / Rodent-borne diseases / Don't know / Other | Categorical (multiple) | If H2.1=Yes |

|             |                                                                          |                                              |                              |      |
|-------------|--------------------------------------------------------------------------|----------------------------------------------|------------------------------|------|
| <b>H2.4</b> | Do you think climate change increases mosquito populations?              | 0. Yes / 1. No / 2. Don't know               | Categorical (single)         | None |
| <b>H2.5</b> | Do you think changes in rainfall affect the risk of infectious diseases? | Yes, a lot / Yes, a little / No / Don't know | Categorical (single ordinal) | Non  |

### ***H3 – Household Adaptation Practices***

| <b>Code</b> | <b>Question</b>                                                | <b>Response options</b>                                                                                                                       | <b>Variable type</b>   | <b>Skip logic</b> |
|-------------|----------------------------------------------------------------|-----------------------------------------------------------------------------------------------------------------------------------------------|------------------------|-------------------|
| <b>H3.1</b> | Do you have any strategy to protect against heat?              | 0. Yes / 1. No                                                                                                                                | Binary                 | None              |
| <b>H3.2</b> | If yes, what changes? (multiple)                               | Staying indoors at noon / Increasing water intake / Using fans / Using AC / Wearing lighter clothes / Avoiding fieldwork at peak heat / Other | Categorical (multiple) | If H3.1=Yes       |
| <b>H3.3</b> | Do you have any strategies to reduce impacts of floods/storms? | 0. Yes / 1. No                                                                                                                                | Binary                 | None              |
| <b>H3.4</b> | If yes, what strategies?                                       | Avoiding walking in floods / Moving animals / Protecting water containers / Cleaning surroundings / Other                                     | Categorical (multiple) | If H3.3=Yes       |

### ***H2 – Climate Health Link Perception***

| <b>Code</b> | <b>Question</b>                                                           | <b>Response options</b>                                                                    | <b>Variable type</b>         | <b>Skip logic</b> |
|-------------|---------------------------------------------------------------------------|--------------------------------------------------------------------------------------------|------------------------------|-------------------|
| <b>H4.1</b> | Has your village/community experienced climate-related events recently?   | Floods / Drought / Storms / Crop losses / Livestock deaths / None / Don't know             | Categorical (multiple)       | None              |
| <b>H4.2</b> | During these events, who provided help or information?                    | Village chief / Health center / NGO / Radio / Social Media / Family / Nobody / Other       | Categorical (multiple)       | None              |
| <b>H4.3</b> | Do you receive climate or weather warnings?                               | 0. Yes / 1. No / 2. Don't know                                                             | Categorical (single)         | None              |
| <b>H4.4</b> | If yes, through which channels?                                           | TV / Radio / Social Media / Messaging apps / Village chief / Loudspeaker / Other           | Categorical (multiple)       | If H4.3=Yes       |
| <b>H4.5</b> | Do you trust the information you receive about climate risks?             | Yes completely / Yes somewhat / No / Don't know or don't receive any info on climate risks | Categorical (single ordinal) | None              |
| <b>H4.6</b> | Do you feel your community is prepared for future climate-related events? | 0. Yes / 1. No / 2. Don't know                                                             | Categorical (single)         | None              |

## MODULE I — ANIMAL SAMPLING (SUBSET HOUSEHOLDS)

### I0 – Eligibility (Household Filter)

| Code | Question                                                         | Response options | Variable type | Skip logic           |
|------|------------------------------------------------------------------|------------------|---------------|----------------------|
| I0.1 | Is this household selected for animal sampling?                  | 0. Yes / 1. No   | Binary        | If No → End Module I |
| I0.2 | Was the household informed about animal sampling during consent? | 0. Yes / 1. No   | Binary        | Must be Yes          |

### I1 – Animal Roster Confirmation (Based on Module C Data)

| Code | Question                                                                | Response options    | Variable type | Skip logic |
|------|-------------------------------------------------------------------------|---------------------|---------------|------------|
| I1.1 | According to Module C, the household owns the following animal species: | Auto-generated list | Display       | None       |

### I2 – Selections of Animals for Sampling

| Code | Question                                             | Response options                                                                                          | Variable type | Skip logic |
|------|------------------------------------------------------|-----------------------------------------------------------------------------------------------------------|---------------|------------|
| I2.1 | Number of animals available for sampling per species | Auto + Numeric                                                                                            | Mixed         | None       |
| I2.2 | Total number of animals selected / species           | Dog: Number / Chicken: Number / Duck: Number/ Pig: Number / Cattle: Number / Goat: Number / Sheep: Number | Numeric       | None       |
| I2.3 | Individual IDs assigned to sampled animals           | Text/ID codes                                                                                             | Text          | None       |

### I3 – Animal Level Characteristics (One form per selected animal- REDcap repeating instrument)

| Code | Question  | Response options        | Variable type        | Skip logic |
|------|-----------|-------------------------|----------------------|------------|
| I3.1 | Animal ID | Text                    | Text                 | None       |
| I3.2 | Species   | As per species list     | Categorical (single) | None       |
| I3.3 | Sex       | Male / Female / Unknown | Categorical (single) | None       |

|              |                                         |                                                                                                                                |                              |             |
|--------------|-----------------------------------------|--------------------------------------------------------------------------------------------------------------------------------|------------------------------|-------------|
| <b>I3.4</b>  | Age                                     | <3 months / 3–12 months / >1 year / Don't know                                                                                 | Categorical (single ordinal) | None        |
| <b>I3.5</b>  | Purpose                                 | Meat / Eggs / Breeding / Guard / Pet / Transport / Other                                                                       | Categorical (multiple)       | None        |
| <b>I3.6</b>  | Housing type                            | Free roaming / Confined / Tied / Enclosure / Indoors                                                                           | Categorical (single)         | None        |
| <b>I3.7</b>  | Does the animal mix with other species? | 0. Yes / 1. No / 2. Don't know                                                                                                 | Categorical (single)         | None        |
| <b>I3.7a</b> | With which other species                | Text                                                                                                                           | Text                         | If I3.7=Yes |
| <b>I3.8</b>  | Frequency roaming near water bodies     | Daily / Weekly or several times a week / Monthly or several times a month / Yearly or less frequently than once a year / Never | Categorical (single ordinal) | None        |

#### ***I4 – Animal Health Status (Observed + Owner Report)***

| <b>Code</b> | <b>Question</b>                                 | <b>Response options</b>                                                                               | <b>Variable type</b>   | <b>Skip logic</b>           |
|-------------|-------------------------------------------------|-------------------------------------------------------------------------------------------------------|------------------------|-----------------------------|
| <b>I4.1</b> | Is the animal healthy today?                    | 0. Yes / 1. No / 2. Don't know                                                                        | Categorical (single)   | None                        |
| <b>I4.2</b> | If not healthy, what signs?                     | Fever / Weakness / Diarrhea / Coughing / Skin lesions / Neurological signs / Reduced appetite / Other | Categorical (multiple) | If I4.1=No or I4.1=Not sure |
| <b>I4.3</b> | Has the animal been sick in the last 12 months? | 0. Yes / 1. No / 2. Don't know                                                                        | Categorical (single)   | None                        |
| <b>I4.4</b> | Has the animal been vaccinated?                 | 0. Yes / 1. No / 2. Don't know                                                                        | Categorical (single)   | None                        |
| <b>I4.5</b> | If yes, which vaccines?                         | Rabies / FMD / PPR / NDV / CSF / Other                                                                | Categorical (multiple) | If I4.4=Yes                 |
| <b>I4.6</b> | Has the animal been dewormed in the last year?  | 0. Yes / 1. No / 2. Don't know                                                                        | Categorical (single)   | None                        |

#### ***I5 – Specimen Collection (per sampled animal)***

| <b>Code</b> | <b>Question</b> | <b>Response options</b> | <b>Variable type</b> | <b>Skip logic</b> |
|-------------|-----------------|-------------------------|----------------------|-------------------|
|-------------|-----------------|-------------------------|----------------------|-------------------|

|             |                                             |                      |                        |                                                              |
|-------------|---------------------------------------------|----------------------|------------------------|--------------------------------------------------------------|
| <b>I5.1</b> | Blood sample ID                             | 0. Yes / 1. No       | Binary                 | <i>If No → I5.3</i>                                          |
| <b>I5.2</b> | Blood sample volume collected               | mL Numeric           | Numeric                | <i>If I5.1=Yes</i>                                           |
| <b>I5.3</b> | Were swabs collected?                       | Oral / Rectal / None | Categorical (multiple) | Only for pigs and poultry (I3.2)                             |
| <b>I5.4</b> | Were ectoparasites collected on the animal? | 0. Yes / 1. No       | Binary                 | None                                                         |
| <b>I5.5</b> | Sample label/barcode?                       | Text                 | Text                   | <i>If I5.1=0 or (I5.3 contient Oral ou Rectal) OR I5.4=0</i> |
| <b>I5.6</b> | Any sampling complications?                 | None / Minor / Major | Categorical (single)   | None                                                         |

### ***I6 – Biosecurity & Handling Practices***

| <b>Code</b> | <b>Question</b>                                    | <b>Response options</b>        | <b>Variable type</b>   | <b>Skip logic</b> |
|-------------|----------------------------------------------------|--------------------------------|------------------------|-------------------|
| <b>6.1</b>  | Did the sampler wear protective equipment?         | Gloves / Mask / Boots / No PPE | Categorical (multiple) | None              |
| <b>I6.2</b> | Was the procedure performed safely?                | 0. Yes / 1. No / 2. Partially  | Categorical (single)   | None              |
| <b>I6.3</b> | Were animals restrained appropriately?             | 0. Yes / 1. No                 | Binary                 | None              |
| <b>I6.4</b> | Was the sampling area cleaned after the procedure? | 0. Yes / 1. No                 | Binary                 | None              |
| <b>I6.5</b> | Any incidents or injuries during sampling?         | 0. Yes / 1. No                 | Binary                 | If Yes → describe |
