# Supplementary material
Source: Research Square preprint supplement (doi:10.21203/rs.3.rs-9382926/v1)
Supplement: Supplementary file 2 [file 8d115c0a161f581c049e3046.pdf]

## Additional File 1. Extended pathogen panel investigated in RACSMEI

This table presents the extended panel of pathogens investigated as secondary or exploratory outcomes in RACSMEI, including vaccine-preventable, elimination-targeted, emerging, and environmentally mediated pathogens. These analyses leverage the multiplex serological platform and molecular assays to inform long-term surveillance priorities and policy planning.

| Pathogen category                                     | Pathogen                                                   | Host / matrix     | Laboratory methods    |
|-------------------------------------------------------|------------------------------------------------------------|-------------------|-----------------------|
| <b>Vaccine-preventable diseases</b>                   | Measles virus                                              | Humans            | Serology              |
|                                                       | Mumps virus                                                | Humans            | Serology              |
|                                                       | Rubella virus                                              | Humans            | Serology              |
|                                                       | Diphtheria<br>( <i>Corynebacterium diphtheriae</i> )       | Humans            | Serology              |
|                                                       | Tetanus (Clostridium tetani)                               | Humans            | Serology              |
|                                                       | Pertussis (Bordetella pertussis)                           | Humans            | Serology              |
|                                                       | Poliovirus                                                 | Humans            | Serology              |
|                                                       | Varicella-zoster virus                                     | Humans            | Serology              |
|                                                       | Human papillomavirus (HPV)                                 | Humans            | Serology              |
|                                                       | Rotavirus                                                  | Humans            | Serology              |
|                                                       | Streptococcus pneumoniae                                   | Humans            | Serology              |
| Neisseria meningitidis (serogroup A)                  | Humans                                                     | Serology          |                       |
| Yellow fever virus                                    | Humans                                                     | Serology          |                       |
| <b>Emerging and under-documented viruses</b>          | Usutu virus                                                | Humans            | Serology              |
|                                                       | Mayaro virus                                               | Humans            | Serology              |
|                                                       | Oropouche virus                                            | Humans            | Serology              |
|                                                       | Rift Valley fever virus                                    | Humans, livestock | Serology              |
|                                                       | Hepatitis A virus                                          | Humans            | Serology              |
| <b>Enteric and environmentally mediated pathogens</b> | Hepatitis E virus                                          | Humans, pigs      | Serology; RT-qPCR     |
|                                                       | Norovirus                                                  | Humans            | Serology              |
|                                                       | Enteroviruses (EV71, D68)                                  | Humans            | Serology              |
|                                                       | Adenoviruses                                               | Humans            | Serology              |
|                                                       | Salmonella Typhi                                           | Humans            | Serology              |
|                                                       | Vibrio cholerae                                            | Humans, water     | RT-qPCR; metagenomics |
|                                                       | Legionella pneumophila                                     | Water, air        | RT-qPCR; metagenomics |
|                                                       | Mycoplasma pneumoniae                                      | Humans            | Serology              |
| Chlamydia pneumoniae                                  | Humans                                                     | Serology          |                       |
| Lymphatic filariasis                                  | Humans                                                     | Serology          |                       |
| <b>Neglected tropical and parasitic diseases</b>      | Toxoplasma gondii                                          | Humans            | Serology              |
|                                                       | Giardia intestinalis                                       | Humans            | Serology              |
|                                                       | Entamoeba histolytica                                      | Humans            | Serology              |
|                                                       | Strongyloides stercoralis                                  | Humans            | Serology              |
|                                                       | Soil-transmitted helminths (Ascaris, Trichuris)            | Humans            | Serology              |
|                                                       | Liver flukes (Opisthorchis viverrini, Clonorchis sinensis) | Humans            | Serology              |
|                                                       | Schistosoma spp.                                           | Humans            | Serology              |

Abbreviations: RT-qPCR = reverse transcription quantitative polymerase chain reaction. Full assay validation procedures are described in the Methods section.
