# Supplementary material
Source: Research Square preprint supplement (doi:10.21203/rs.3.rs-9382926/v1)
Supplement: Supplementary file 3 [file accdc091d4b03a8e84af6241.pdf]

### Additional File 3. RACSMEI Qualitative Interview Guides

This file contains the semi-structured interview and focus group discussion guides used in the RACSMEI study to explore community perceptions of infectious disease risks, prevention practices, care-seeking behaviours and the acceptability of public health interventions. The guides were developed to support qualitative data collection with community members, local leaders, and institutional stakeholders in selected study sites.

|                                                                                                                                                                                                                                                                                                                                                                                                                                                                                                                                                                                                                                                                                                                                                                                                                                                                                                                                                                                                                                                                                                                                                                                                                                                                                                                                                                                                                                                                     |
|---------------------------------------------------------------------------------------------------------------------------------------------------------------------------------------------------------------------------------------------------------------------------------------------------------------------------------------------------------------------------------------------------------------------------------------------------------------------------------------------------------------------------------------------------------------------------------------------------------------------------------------------------------------------------------------------------------------------------------------------------------------------------------------------------------------------------------------------------------------------------------------------------------------------------------------------------------------------------------------------------------------------------------------------------------------------------------------------------------------------------------------------------------------------------------------------------------------------------------------------------------------------------------------------------------------------------------------------------------------------------------------------------------------------------------------------------------------------|
| <b>Instruction (CORE - common block to all Respondents)</b>                                                                                                                                                                                                                                                                                                                                                                                                                                                                                                                                                                                                                                                                                                                                                                                                                                                                                                                                                                                                                                                                                                                                                                                                                                                                                                                                                                                                         |
| The objective of the interview is to collect information about perceptions, actions, knowledge, awareness on management and surveillance of infectious diseases at both community and provincial levels.                                                                                                                                                                                                                                                                                                                                                                                                                                                                                                                                                                                                                                                                                                                                                                                                                                                                                                                                                                                                                                                                                                                                                                                                                                                            |
| <p>Participants at <b>community level</b> include 12 people per village:</p> <p>Human health sector – 5 participants:</p> <ul style="list-style-type: none"> <li>1 health center staff</li> <li>1 general physician/nurse (private)</li> <li>1 pharmacist</li> <li>1 village health support group (VHSG)</li> <li>1 head of village or deputy-head</li> </ul> <p>Animal health sector – 3 participants:</p> <ul style="list-style-type: none"> <li>1 village animal health worker (VAHW)</li> <li>1 private veterinarian</li> <li>1 veterinary drug vendor (drug seller or depot)</li> </ul> <p>Environmental health and climate sector – 4 participants:</p> <ul style="list-style-type: none"> <li>1 health center staff</li> <li>1 NGO/conservation worker</li> <li>1 teacher (primary-high school)</li> <li>1 farmer</li> </ul> <p>Participants at <b>provincial level</b> include 3 people per province:</p> <ul style="list-style-type: none"> <li>1 provincial health officer</li> <li>1 provincial animal health officer</li> <li>1 provincial environmental officer</li> </ul> <p>A total of <b>795 total participants</b> in 60 villages from 25 provinces in Cambodia will be interviewed, including:</p> <p>Community level (720 participants): 300 participants from human health, 180 from animal health, and 240 from environment and climate sectors</p> <p>Provincial level (75 participants): 25 participants from each of the three sectors.</p> |
| <p>Interview methodology: Individual and recorded interviews.</p> <p>Duration: minimum of 60 minutes</p> <p>Consent form must be filled in.</p>                                                                                                                                                                                                                                                                                                                                                                                                                                                                                                                                                                                                                                                                                                                                                                                                                                                                                                                                                                                                                                                                                                                                                                                                                                                                                                                     |
| This interview guide is divided into several parts.                                                                                                                                                                                                                                                                                                                                                                                                                                                                                                                                                                                                                                                                                                                                                                                                                                                                                                                                                                                                                                                                                                                                                                                                                                                                                                                                                                                                                 |

**Legend:**

(CORE – asked to ALL Human/Animal/Environmental Health and Climate Respondent profiles)

(NON-CORE – profile names)

(PROFILE-SPECIFIC – profile name only)

**Section 1: Identification of participant** (CORE - common block to all respondent profiles)

Date of interview (DD-MM-YYYY): .....

Interviewer: .....

Interview number: .....

Full name: .....

Location (Province, district, commune, village) : .....

Mobile: .....

Age: .....

Year of Birth: .....

Gender: .....

Education level: .....

Profession(s): .....

Name of working place .....

**Human Health Questions**

**Section 2: Job and duties of participant**

1. (CORE – asked to all Human Health Respondent profiles): Could you describe your role(s) and responsibilities?
2. (CORE – asked to all Human Health Respondent profiles): How long have you been in this role?
3. (NON-CORE – Provincial Health Officer, Health Center Staff, Pharmacist, Private General Physician / Nurse): How many staff are there in your workplace?
4. (NON-CORE – Health Center Staff, Private General Physician/Nurse, Pharmacist): How many patients per day on average come to the facility you work in?

**Section 3: Transmission, Environmental Risk Factors and Vectors**

**Perception toward diseases and transmission risks**

5. (NON-CORE – Provincial Health Officer, Health Center Staff, Pharmacist, Private General Physician / Nurse): From what you see on daily activities, what usually spreads diseases in this province/area? What are the main disease vectors you observe? How do these vary between districts?
6. (NON-CORE – Provincial Health Officer, Health Center Staff, Private General Physician / Nurse): Are there animals or places in the environment that worry you more when it comes to diseases? Why?
7. (CORE – asked to all Human Health Respondent profiles): Thinking about changes in the environment how do these affect diseases here? Can you give concrete examples?
8. (CORE – asked to all Human Health Respondent profiles): How do seasonal changes/calendars affect disease incidence across different districts in your province/area? Are there times when people get sick more often?

**Emerging risks**

9. (NON-CORE – Provincial Health Officer, Health Center Staff): Which diseases are prevalent in your province/area based on surveillance data in the last 12 months? Which ones concern you most, and what factors might explain the increasing or decreasing trends you have observed?
10. (PROFILE-SPECIFIC – Provincial Health Officer only): What is the level of risk emergence/re-emergence (low/medium/high)? Please explain the reason.
11. (NON-CORE – Provincial Health Officer, Health Center Staff, Private General Physician / Nurse): Which population groups are the most at risk in your province/area and what factors contribute to their vulnerability? What risky behaviors have you identified? What provincial strategies address these disparities/How do community members cope with these health risks?
12. (PROFILE-SPECIFIC – Pharmacist only): When you look at your daily work in the pharmacy, which medicines do you feel are being asked for more and more? Are there medicines that are requested less than before? What factors (disease patterns, insurance coverage) contribute to these patterns?
13. (PROFILE-SPECIFIC – Pharmacist only): Have you experienced situations where some medicines were missing or almost out of stock? Which medicines? Can you tell me about the last time this happened and how you managed it? How often do stock shortages happen in your pharmacy or in this province? From what you see, would you say this is rare, occasional, or frequent? Why?

14. *(PROFILE-SPECIFIC – Pharmacist only)*: In your experience, who has the hardest time getting medicines here? Are there specific villages, groups of people, or situations where access is more difficult? Can you explain why?

**Vectors and reservoirs**

15. *(NON-CORE – Provincial Health Officer, Health Center Staff, Pharmacist, Private General Physician / Nurse)*: Which disease vectors do you most commonly see affecting people/patients in your area? Have these changed over the seasons?
16. *(PROFILE-SPECIFIC – Provincial Health Officer only)*: Can you list the main disease reservoirs in your area?
17. *(NON-CORE – Health Center Staff, Pharmacist, VHSG, Head of Village, Private General Physician / Nurse)*: Do you know of any animals or insects or environmental factors that can cause diseases or health problems to humans? Can you give me some examples?
18. *(NON-CORE – Health Center Staff, Pharmacist, Private General Physician / Nurse)*: In your opinion, how do environmental factors influence their spread?
19. *(NON-CORE – Health Center Staff, Pharmacist, Private General Physician / Nurse)*: How do seasonal changes, village infrastructure, or farming practices affect the types of illnesses you treat at the health center?
20. *(NON-CORE – Health Center Staff, VHSG, Head of Village, Private General Physician / Nurse)*: Do you know how dengue, chikungunya, or Zika are transmitted? If yes, can you explain with your knowledge what these diseases are and how they are transmitted?
21. *(NON-CORE – Health Center Staff, VHSG, Head of Village, Private General Physician / Nurse)*: Do you believe dengue, chikungunya, zika or Japanese encephalitis are currently present or actively circulating in your community? Why?

**Knowledge, practice, and local challenges**

22. *(PROFILE-SPECIFIC – Pharmacist only)*: As a pharmacist, what are the main medicines you distribute in your village? Where do the medicines or vaccines you use come from? Are they provided through official channels, or do you sometimes need to find them elsewhere?
23. *(PROFILE-SPECIFIC – Pharmacist only)*: Have you seen some changes in the last 12 months in the medicine demand in your village? How does your pharmacy adjust inventory accordingly?

**Section 4: Community perception and behavior**

**Awareness, practices and fears**

24. *(PROFILE-SPECIFIC – Provincial Health Officer only)*: What challenges do provincial and district health facilities face in promoting early symptoms recognition?
25. *(NON-CORE – Health Center Staff, Pharmacist, Private General Physician / Nurse)*: How do you recognize early symptoms of target diseases (please refer to the appendix)? And what challenges do you face to identify the diseases? Why?
26. *(NON-CORE – Provincial Health Officer, Health Center Staff, Pharmacist, Private General Physician / Nurse)*: Which preventive measures have your Provincial health Department/facility prioritized? How are these adapted to district/area specific needs?
27. *(PROFILE-SPECIFIC – Provincial Health Officer only)*: What are the most effective health promotion programs in your province, and what factors have influenced their success or created barriers to adoption?
28. *(CORE – asked to all Human Health Respondent profiles)*: How does people's fear of disease manifest? And what are the community's main concerns/Have you ever feared contracting a disease from mosquitoes, animals, other people, or the environment/climate? Why?
29. *(NON-CORE – Provincial Health Officer, Health Center Staff, Pharmacist, Private General Physician / Nurse)*: Did you observe any socio-economic differences regarding the perception and management of disease risk?
30. *(PROFILE-SPECIFIC – Provincial Health Officer only)*: How do these influence your resource allocation decisions?
31. *(CORE – asked to all Human Health Respondent profiles)*: Have you ever changed any of your habits because you were afraid of catching a disease? Which habits and why? Based on your opinion, have people in your community changed any habits?
32. *(PROFILE-SPECIFIC – Provincial Health Officer only)*: How do risk perceptions influence preventive measures adoption rates across different districts in your province?
33. *(NON-CORE – Health Center Staff, VSHG, Head of Village, Private General Physician / Nurse)*: How serious do you consider dengue, chikungunya, zika, Japanese encephalitis to be for an individual compared to diseases like the flu or cancer?
34. *(NON-CORE – Health Center Staff, VSHG, Head of Village, Private General Physician / Nurse)*: In your opinion, who is the most vulnerable to these diseases? Why?

**Access to care**

35. (CORE: asked to all Human Health Respondent profiles): What healthcare resources do people typically access first when experiencing symptoms, and what factors influence these decisions?
36. (CORE: asked to all Human Health Respondent profiles): In your opinion, what are the obstacles for the population of your province to access healthcare? How do these barriers vary between urban and rural areas?

### Communication

37. (CORE: asked to all Human Health Respondent profiles): In your opinion, what are the best ways to inform the population about diseases? What roles do local media play in managing population's risk perception?
38. (NON-CORE – Health Center Staff, Private General Physician / Nurse, Pharmacist, VSHG): What common health misconceptions and disinformation do you encounter among patients? How do you correct these while maintaining trust? What are the trusted sources do you recommend for your patients/people?

## Section 5: Medical practices and healthcare system

### Diagnosis and treatment

39. (NON-CORE – Provincial Health Officer, Health Center Staff, Private General Physician / Nurse, Pharmacist, VSHG): How do you and your collaborators/authorities manage the concern of medicine or vaccine shortages? What systems ensure equitable distribution across districts/What systems are in place for forecasting, stockpiling, and emergency distribution?
40. (NON-CORE – VSHG, Head of Village): What do you know about available treatments or medication for dengue, zika, chikungunya and Japanese encephalitis? Where would you get them, and are there any traditional remedies you would use?
41. (NON-CORE – Provincial Health Officer, Health Center Staff, Private General Physician / Nurse, Pharmacist, VSHG): From your experience, what challenges regarding appropriate medication use exist in your area? How prevalent across different districts?
42. (CORE: asked to all Human Health Respondent profiles): Are self-medication and medication adherence issues being a concern in the area? If so, why?
43. (PROFILE-SPECIFIC – Pharmacist only): What high-risk medication practices does your pharmacy frequently observe? How have you addressed these through patient education?
44. (CORE: asked to all Human Health Respondent profiles): Are people well informed about the risks of misusing drugs? Please, give some examples of health preventive/education campaign/action.
45. (NON-CORE – Health Center Staff, Private General Physician / Nurse, Pharmacist, VSHG, Head of Village): Normally, how do you dispose unused or expired drugs? Can you describe your process?

### Professional training

46. (NON-CORE – Provincial Health Officer, Health Center Staff, Private General Physician / Nurse): Are healthcare workers in your area/you trained in the diagnosis and treatment of dengue, zika, chikungunya and Japanese encephalitis? What district level variations exist and why?
47. (NON-CORE – Health Center Staff, Private General Physician / Nurse, VSHG): When someone comes to the health center/you with fever, headache, or body pain, how do you usually handle the case? Can you describe what you do, step by step?
48. (PROFILE-SPECIFIC – Pharmacist only): Where have you been trained in dispensing and counseling? Why?
49. (PROFILE-SPECIFIC – Pharmacist only): Where do you stock drugs and vaccines? Is there any protocol for that?
50. (PROFILE-SPECIFIC – Provincial Health Officer only): What clinical protocol has your province implemented for priority disease? How do you monitor protocol adherence across different districts? Do you apply these protocols, and if not, why?
51. (NON-CORE – Provincial Health Officer, Health Center Staff, Private General Physician / Nurse, VSHG): Do they/you receive regular training on priority diseases? Do you think this training is enough to ensure proper patient care and disease surveillance in communities?
52. (NON-CORE – Provincial Health Officer, Health Center Staff, Pharmacist, VSHG): What training needs have you identified among your staff/community?
53. (PROFILE-SPECIFIC – Head of Village only): Where did you get your knowledge about diseases and their treatments? Which sources of information do you use?

### Antimicrobial resistance

54. (PROFILE-SPECIFIC – Provincial Health Officer only): How is AMR monitored and addressed in your province? What patterns has your provincial surveillance detected, and how do these patterns vary across districts?
55. (NON-CORE – Health Center Staff, Private General Physician / Nurse, Pharmacist, VSHG): Have you already heard about AMR? If so, have you observed AMR in any of the infections? Which ones? Please, describe.
56. (PROFILE-SPECIFIC – Health Center Staff only): How are antibiotics and other medical/laboratory waste managed at your health center?

57. (NON-CORE – Health Center Staff, Pharmacist, Private General Physician / Nurse, VSHG): Do you know the AMR protocol? If yes, how accessible are clinical guidelines at your facility? What challenges affect protocol implementation?
58. (PROFILE-SPECIFIC – Head of Village only): Do you know about antibiotics? Have you taken any in the past year? If yes, which ones did you take and why? Do you know what antibiotics do? What do you think about how well they work? Do you understand how they fight infections? Who explains it to you?

## Section 6: Surveillance and Coordination Across Sectors

### Detection and Reporting

59. (PROFILE-SPECIFIC – Provincial Health Officer only): How does your provincial surveillance system function? What are the reporting pathways from community level through district to provincial offices?
60. (NON-CORE – Health Center Staff, Private General Physician / Nurse, Pharmacist, VSHG, Head of Village): Do you report any suspected cases of dengue, zika, chikungunya and Japanese encephalitis? If yes, what is the reporting chain and timeline? If not, why? In case of outbreaks, what is your management procedure?
61. (PROFILE-SPECIFIC – Pharmacist only): How does your pharmacy track medication dispensing patterns? What systems do you use to monitor consumption trends and adverse effects?
62. (CORE: asked to all Human Health Respondent profiles): From your experience, what are major challenges affecting timely disease detection, reporting a response in your village? Please explain why.
63. (PROFILE-SPECIFIC – Health Center Staff): How do community members recognize indications of potential health risks from their surroundings on their own and take actions?
64. (NON-CORE – Health Center Staff, Private General Physician / Nurse, VSHG, Head of Village): How is the emergency information delivered to people in your village when (or if) there are (or were) public emergencies such as disease outbreaks, floods, droughts, storms, etc.? And who is responsible for reporting these issues in your community?
65. (NON-CORE – Provincial Health Officer, Health Center Staff, Private General Physician / Nurse): How effective are the current health surveillance and reporting systems? What could be improved?

### One Health Approach

66. (CORE: asked to all Human Health Respondent profiles): Is there any collaboration between the human health, animal health and environmental health sectors? If so, please provide some examples. If not, where?
67. (PROFILE-SPECIFIC – Pharmacist only): What formal mechanisms for collaboration exist between your pharmacy and other healthcare providers in your village? How are prescription verification and medication reconciliation coordinated?
68. (CORE: asked to all Human Health Respondent profiles): How could coordination between the different actors, with veterinary services, be improved? How can collaboration between human, animal and environmental sectors be optimized?
- 69.

## Section 7: Suggestions and innovations

70. (CORE: asked to all Human Health Respondent profiles): Do you have any specific suggestions for improving access to care and its quality?
71. (CORE: asked to all Human Health Respondent profiles): What measures could be implemented to improve both accesses to care and overall system quality? Have you implemented any recent initiatives?
72. (CORE: asked to all Human Health Respondent profiles): Are there any other important points you wish to share that have not been discussed?

**Thank you for your participation and feedback!**

## Animal Health Questions

### Section 2: Job and duties of participant

1. (CORE – asked to all Animal Health Respondent profiles): Could you describe your role(s) and responsibilities?
2. (CORE – asked to all Animal Health Respondent profiles): How long have you been in this role?
- 3.

### Section 3: Knowledge, Practices, and Local Challenges

#### Disease knowledge & prioritization

4. (CORE – asked to all Animal Health Respondent profiles): Are there any diseases that are particularly common in your local area? If so, which one?
5. (CORE – asked to all Animal Health Respondent profiles): Regarding the following diseases (Please refer to the appendix), which ones do you know about, and which ones are the most of concern in your region? Of these, which ones are known by livestock breeders in the area, and which ones are they worried about? Why?

#### Animal species, vulnerability & practices

6. (NON-CORE – VAHW, Private Veterinarian, Veterinary Drug Vendor): Do you know which domestic animals show frequent signs of zoonotic diseases? How do people interact with these animals?
7. (NON-CORE – VAHW, Private Veterinarian): In a village setting, which animals are most vulnerable to disease? How do you advise owners on prevention?

#### Preventive measures & barriers

8. (CORE – asked to all Animal Health Respondent profiles): What protections are often adopted in your area? Please, describe.
9. (CORE – asked to all Animal Health Respondent profiles): Are there any practices that hinder disease prevention efforts in animals? If so, please, describe.
10. (PROFILE-SPECIFIC – Provincial Animal Health Officer only): Which preventive measures have your Animal Health Department prioritized? How are these adapted to district specific needs?
11. (PROFILE-SPECIFIC – Provincial Animal Health Officer only): How can adherence to preventive measures be improved?

#### Recognition of disease & seasonality

12. (NON-CORE – VAHW, Private Veterinarian): How do villagers / clientele recognize when their animals are sick? What traditional knowledge guides their observations?
13. (CORE – asked to all Animal Health Respondent profiles): How have seasonal changes/calendar affected animal health in the village?

#### Livelihood & economic impact

14. (NON-CORE – VAHW, Private Veterinarian): Which animal diseases most severely impact village livelihoods/your client's livelihoods?
15. (NON-CORE – VAHW, Private Veterinarian): Which disease among your clientele represents the highest economic or public health concerns? In your opinion, how does this differ from village settings?

#### Drug use, supply & markets

16. (PROFILE-SPECIFIC – Veterinary Drug Vendor only): As a Veterinary Drug Vendor, what are the main veterinary drugs you distribute in your area, and how does this vary between districts?
17. (PROFILE-SPECIFIC – Veterinary Drug Vendor only): Have you seen some changes in the last 12 months in the medicine demand in your village? How does your depot adjust inventory accordingly?
18. (PROFILE-SPECIFIC – Veterinary Drug Vendor only): Based on your depot records, which medicines show increasing or decreasing dispensing trends? What factors contribute to these patterns?
19. (PROFILE-SPECIFIC – Veterinary Drug Vendor only): What supply chain issues contribute to veterinary drug shortages in your province? What impact do you think they have on animal health?
20. (PROFILE-SPECIFIC – Veterinary Drug Vendor only): Which demographic or geographic populations in your province face disproportionate challenges in medication access? And what factors contribute to their vulnerability?

#### Communication and Engagement

21. (CORE – asked to all Animal Health Respondent profiles): Which communication channels do you use to get information about animal health? And which of these are the most effective for raising awareness? Why?
22. (CORE – asked to all Animal Health Respondent profiles): When people talk about animal diseases in the village, what ideas do you hear that are not correct? How do you react when this happens?
23. (PROFILE-SPECIFIC – Veterinary Drug Vendor only): What challenges do veterinary drug vendors face in promoting appropriate animal drug use among farmers?

#### Section 4: Access to Veterinary Care

##### Barriers and solutions for treatment

24. (CORE – asked to all Animal Health Respondent profiles): Where and when do farmers seek help with sick animals? What obstacles do they face? Please, describe.
25. (CORE – asked to all Animal Health Respondent profiles): In your opinion, are there differences in access to veterinary care between rural and urban areas? Which ones? What would you say are the main reasons for these differences?
26. (NON-CORE – Provincial Officer, VAHW): What is the availability of vaccines/treatments for zoonoses in your province? How do vet authorities manage shortages and their impacts?

##### Treatment Best Practices

27. (CORE – asked to all Animal Health Respondent profiles): According to your observations, is self-medication in animals by farmers a concern? Why? How can they be trained about risks?
28. (CORE – asked to all Animal Health Respondent profiles): Are there standardized protocols for diagnosis and monitoring zoonoses? Please, describe.
29. (NON-CORE – VAHW, Private Veterinarian, Veterinary Drug Vendor): What local farming methods make animals more or less likely to get sick? How do you help change practices that might cause health problems?

#### Section 5: Surveillance and Institutional Coordination

##### Outbreak detection and response

30. (CORE – asked to all Animal Health Respondent profiles): Which diseases are usually reported / heard in your area? Who reports them and how long does it usually take?
31. (CORE – asked to all Animal Health Respondent profiles): What barriers prevent early detection and reporting of animal diseases?
32. (CORE – asked to all Animal Health Respondent profiles): Do veterinary services collaborate with labs and public health agencies for surveillance? If yes, how do they collaborate, and what role do environmental agencies play?

##### Preparedness and Alerts

33. (CORE – asked to all Animal Health Respondent profiles): Is there any early warning system for animal disease outbreaks? What information sources are used (labs, clinics, etc.)? Please, explain.
34. (CORE – asked to all Animal Health Respondent profiles): Do veterinarians / animal health workers receive regular training on zoonoses? Is this training sufficient?

#### Section 6: Suggestions and innovations

35. (CORE – asked to all Animal Health Respondent profiles): In your opinion, how could early detection of zoonoses and outbreak response be strengthened?
36. (CORE – asked to all Animal Health Respondent profiles): What practical solutions would you propose to improve access to veterinary care? Please, give your opinion.
37. (CORE – asked to all Animal Health Respondent profiles): How can collaboration between veterinary, human health, wildlife and environmental sectors be optimized?
38. (CORE – asked to all Animal Health Respondent profiles): What regulatory or policy changes would improve private veterinary practice? How could public-private partnerships be strengthened?
39. (CORE – asked to all Animal Health Respondent profiles): Are there any other critical points you would like to raise because you believe it is essential for better zoonotic disease control in your region?

**Thank you for your participation and feedback!**

## Environmental Health and Climate Questions

### Section 2: Job and duties of participant

1. (CORE – asked to all Environmental Health and Climate Respondent profiles): Could you describe your role(s) and responsibilities?
2. (CORE – asked to all Environmental Health and Climate Respondent profiles): How long have you been in this role? How many years of experience have you had in this profession overall? Do your activities relate to health and/or to climate change?
3. (CORE – asked to all Environmental Health and Climate Respondent profiles): How many staff/students are there in your workplace? How many staff are working on the environment and climate change in this area?
4. (CORE – asked to all Environmental Health and Climate Respondent profiles): How many hours do you spend outdoors during the day on your job or daily activities?
5. (PROFILE-SPECIFIC – Farmer only): Could you tell us what type of crops you grow? On what type of farm do you work? What surface of land do you cultivate? Do you raise any animals? If yes, what types of animals do you raise? How many animals do you have?
6. (PROFILE-SPECIFIC – Farmer only): How long have you been farming? What are your daily activities and what are the main tasks you are responsible for? Please, describe.

### Section 3: Perception on climate change and well-being

#### Perception toward climate change

7. (CORE – asked to all Environmental Health and Climate Respondent profiles): Have you heard of the terms “Climate Change” and “Global Warming”? Could you describe what you know about climate change / global warming? Where did you hear about them?
8. (CORE – asked to all Environmental Health and Climate Respondent profiles): Would you say that your community / province has experienced changes in climate over the last 1–5 years? If yes, what changes?
9. (CORE – asked to all Environmental Health and Climate Respondent profiles): Besides climate change, have you noticed any environmental changes in your village/community/province? Please describe them.
10. (CORE – asked to all Environmental Health and Climate Respondent profiles): Do you think these changes relate to or influence the lifestyles, health, and well-being of humans, animals, and nature directly and indirectly? If yes, how and what impacts? Can you describe the causes of these impacts?
11. (CORE – asked to all Environmental Health and Climate Respondent profiles): Do climatic and environmental changes worry you, and if yes, what worries you the most now and in the future?
12. (PROFILE-SPECIFIC – Teacher only): Does the school sometimes suffer from heat stress? Is anything done to reduce its impact?
13. (PROFILE-SPECIFIC – Farmer only): Do you sometimes suffer from heat stress considering the amount of time you spend outdoors? If yes, what do you do to reduce its impact?

### Section 4: Climate change, infectious diseases, health, and preventive measures

#### Exposure, risks, and impacts

14. (CORE – asked to all Environmental Health and Climate Respondent profiles): Has your community / province ever experienced any extreme weather events? Please describe them.
15. (NON-CORE – Provincial Environmental Officer, Farmer): How have these events impacted food and water security, crops, animals, livelihoods, or economic activities?
16. (CORE – asked to all Environmental Health and Climate Respondent profiles): Have people in your community / province experienced diseases or health problems linked to climate or environmental changes in the last 12 months? If yes, which ones? Have these increased or decreased? Why?
17. (CORE – asked to all Environmental Health and Climate Respondent profiles): Which disease vectors and reservoirs do you commonly see affecting people or animals in your area? How have these changed over the last few years?
18. (CORE – asked to all Environmental Health and Climate Respondent profiles): In your opinion, how do factors such as environment, climate, urbanization, etc. influence the spread of these vectors and reservoirs? Why?
19. (CORE – asked to all Environmental Health and Climate Respondent profiles): Which population groups are the most at risk and what factors contribute to their vulnerability?

### Antimicrobial resistance & pesticide

20. (NON-CORE – Provincial Environmental Officer, NGO Worker, Farmer): Is antimicrobial resistance (AMR) or pesticide resistance a concern in your area? What are your opinions on the link between climate, environment, and AMR / pesticide resistance?

### Surveillance, detection, and reporting

21. (NON-CORE – Provincial Environmental Officer, NGO Worker, Health Center Staff): When there are environmental risks or infectious diseases affecting water, air, humans, animals, or biodiversity, how does your institution / community play a role in surveillance and response?
22. (PROFILE-SPECIFIC – Farmer only): Do you encounter any suspected cases of pesticide/chemical poisoning in your area? If yes, do you report it? If yes, who do you report to? If not reported, why? If there are pesticide/chemical poisoning, what indications do you recognize that would influence your decision in reporting the cases?
23. (PROFILE-SPECIFIC – Health Center Staff only): How effective are current disease surveillance, reporting, and early warning systems? What could be improved?
24. (NON-CORE – Provincial Environmental Officer, NGO Worker, Health Center Staff): Is there collaboration with human health, animal health, agricultural or environmental sectors? What are the challenges for timely detection, reporting, and response?
25. (CORE – asked to all Environmental Health and Climate Respondent profiles): How is emergency information delivered to people when there are public emergencies (disease outbreaks, floods, droughts, storms, pollution, etc.)?

### Preventive and protective measures

26. (CORE – asked to all Environmental Health and Climate Respondent profiles): Are there preventive and protective measures for climate-sensitive risks? Do people follow them? Do you think risk perception influences adherence to practice?
27. (CORE – asked to all Environmental Health and Climate Respondent profiles): Are there local beliefs or practices that prevent people from using these measures? If yes, which ones?
28. (CORE – asked to all Environmental Health and Climate Respondent profiles): For vulnerable populations discussed previously, what should be the measures for them?

### Access to care

29. (NON-CORE – Health Center Staff, Teacher, Farmer): Where do people go first when experiencing fever or suspicious symptoms of illness and what factors influence these decisions?
30. (NON-CORE – Health Center Staff, Teacher, Farmer): What are the most significant obstacles to healthcare access in your area? How do these barriers vary between urban and rural areas?

## Section 5: Climate change and profession

### Work / professional practice

31. (CORE – asked to all Environmental Health and Climate Respondent profiles): How have climate and environmental changes affected your professional practices over the past five years? What challenges do you face?
32. (PROFILE-SPECIFIC – Provincial Environmental Officer only): Have you or your department worked on projects linking environment / climate change to health? Please describe.
33. (PROFILE-SPECIFIC – Provincial Environmental Officer only): Are there local or international initiatives related to health, climate change, clean water, or environment in your province?
34. (PROFILE-SPECIFIC – Health Center Staff only): Have you observed changes in patient numbers or disease patterns that you think could be related to climate change?
35. (PROFILE-SPECIFIC – Farmer only): Have you changed farming practices due to climate or environmental changes? What challenges do you face?

### Waste management

36. (NON-CORE – Health Center Staff, Farmer, NGO Worker): How is waste managed in your community? Do you think improper waste handling affects the environment or contributes to climate change?
37. (PROFILE-SPECIFIC – Farmer only): Are you aware of the risks of misusing these chemicals? If yes, please give some examples.
38. (PROFILE-SPECIFIC – Farmer only): How do you and other farmers in your village manage farming and chemical waste?

### Professional training

39. (CORE – asked to all Environmental Health and Climate Respondent profiles): Have you received any training related to environment, climate, or health risks? Do you think it is sufficient? Why?

40. *(PROFILE-SPECIFIC – Provincial Environmental Officer only)*: Have you received training on prevention and control of vector-borne diseases, zoonotic diseases, and other climate-sensitive diseases? Do you think this would be important for you personally or for your profession? Why?
41. *(PROFILE-SPECIFIC – Provincial Environmental Officer only)*: Would training on environment / climate and health knowledge be useful for stakeholders in the human, animal health, or agricultural sectors? Why?
42. *(CORE – asked to all Environmental Health and Climate Respondent profiles)*: What other training needs have you identified for yourself or your community?
43. *(PROFILE-SPECIFIC – Farmer only)*: Have you and other farmers in your village received any training on how to use fertilizer and pesticides? Have you had any training on green farming or smart farming practices? Are there any organization or company initiatives on these farming practices in your village?

## Section 6: Climate change and education

### Awareness and communication

44. *(CORE – asked to all Environmental Health and Climate Respondent profiles)*: What do you consider to be the best channels for raising awareness on climate-sensitive diseases and environmental health risks?
45. *(PROFILE-SPECIFIC – Provincial Environmental Officer only)*: What do you think could be the challenges in improving climate change and health education for your community?
46. *(CORE – asked to all Environmental Health and Climate Respondent profiles)*: What common health or environment / climate misconceptions or disinformation do you encounter? How do you correct them while maintaining trust?

### Climate & health knowledge in school

47. *(CORE – asked to all Environmental Health and Climate Respondent profiles)*: Do you think climate and health knowledge should be taught at school? At which grades or ages?
48. *(CORE – asked to all Environmental Health and Climate Respondent profiles)*: Which knowledge of climate and health do you think is most important for the younger generation?
49. *(PROFILE-SPECIFIC – Teacher only)*: Does your school address climate change, infectious diseases, pollution, biodiversity loss, or deforestation? Should it?

## Section 7: Suggestions and innovations

50. *(CORE – asked to all Environmental Health and Climate Respondent profiles)*: What do you think of your capacity to support your community from the impacts of climate change?
51. *(CORE – asked to all Environmental Health and Climate Respondent profiles)*: What practical and realistic actions could improve health, environment / climate, and education systems?
52. *(CORE – asked to all Environmental Health and Climate Respondent profiles)*: Are there any other critical points you would like to raise that have not been discussed?

**Thank you for your participation and feedback!**
